# Supplementary material
Source: publisher figshare collection journal article supplement (https://tandf.figshare.com/ndownloader/files/20711166)
Supplement: Supplementary file 1 [file 20711166]

## Supplementary Materials

### Identification of the impurities in chloroephedrine samples by HPLC-IT/TOF-MS and preparation of chloroephedrine standard

Xiaomeng Ma <sup>1,4</sup>, Lan Jin <sup>1</sup>, Hui Zheng <sup>2</sup>, Yun Wei <sup>1\*</sup>, Xingjun Xi<sup>3</sup>, and Tao Lan <sup>3\*\*</sup>

*1. State Key Laboratory of Chemical Resource Engineering, Faculty of Sciences, Beijing University of Chemical Technology, Beijing 100029, China;*

*2. Drug Detection Division, Institute of Forensic Science, Ministry of Public Security, Beijing 100038, China*

*3. China National Institute of Standardization, No. 4 Zhichun Road, Haidian District, Beijing 100191, P. R. China*

*4. State Environmental Protection Key Laboratory of Pollutants Metrology and Reference Materials Research, Institute for Environmental Reference Materials of Ministry of Environmental Protection, Beijing 100029, China*

**Table S1.** Characterization summary of the impurities identified in chloroephedrine samples

| Identity        | R <sub>t</sub> /min | Intensity/10 <sup>6</sup><br>cps | Molecular<br>formula                | Experimental<br>mass (m/z) | Theoretical<br>mass (m/z) | Error/mDa | Degree<br>of unsaturation | Fragment ion                                                                                                                                                                                                                                      |
|-----------------|---------------------|----------------------------------|-------------------------------------|----------------------------|---------------------------|-----------|---------------------------|---------------------------------------------------------------------------------------------------------------------------------------------------------------------------------------------------------------------------------------------------|
| Chloroephedrine | 6.869               | 7.203                            | C <sub>10</sub> H <sub>14</sub> ClN | 183.0885                   | 183.0821                  | -6.43     | 4                         | 184.1046 (C <sub>10</sub> H <sub>15</sub> ClN <sup>+</sup> )<br>148.0938 (C <sub>10</sub> H <sub>14</sub> N <sup>+</sup> )<br>133.0389 (C <sub>9</sub> H <sub>11</sub> N <sup>+</sup> )<br>117.0526 (C <sub>9</sub> H <sub>9</sub> <sup>+</sup> ) |
| Impurity 1      | 7.692               | 2.758                            | C <sub>10</sub> H <sub>14</sub> ClN | 183.0860                   | 183.0821                  | -3.99     | 4                         | 184.1021 (C <sub>10</sub> H <sub>15</sub> ClN <sup>+</sup> )<br>148.1028 (C <sub>10</sub> H <sub>14</sub> N <sup>+</sup> )<br>133.0650 (C <sub>9</sub> H <sub>11</sub> N <sup>+</sup> )<br>117.0712 (C <sub>9</sub> H <sub>9</sub> <sup>+</sup> ) |
| Impurity 2      | 19.420              | 3.706                            | C <sub>19</sub> H <sub>22</sub> ClN | 299.1512                   | 299.1568                  | 5.61      | 9                         | 300.1043 (C <sub>19</sub> H <sub>23</sub> ClN <sup>+</sup> )<br>264.2059 (C <sub>19</sub> H <sub>22</sub> N <sup>+</sup> )                                                                                                                        |

R<sub>t</sub>: retention time

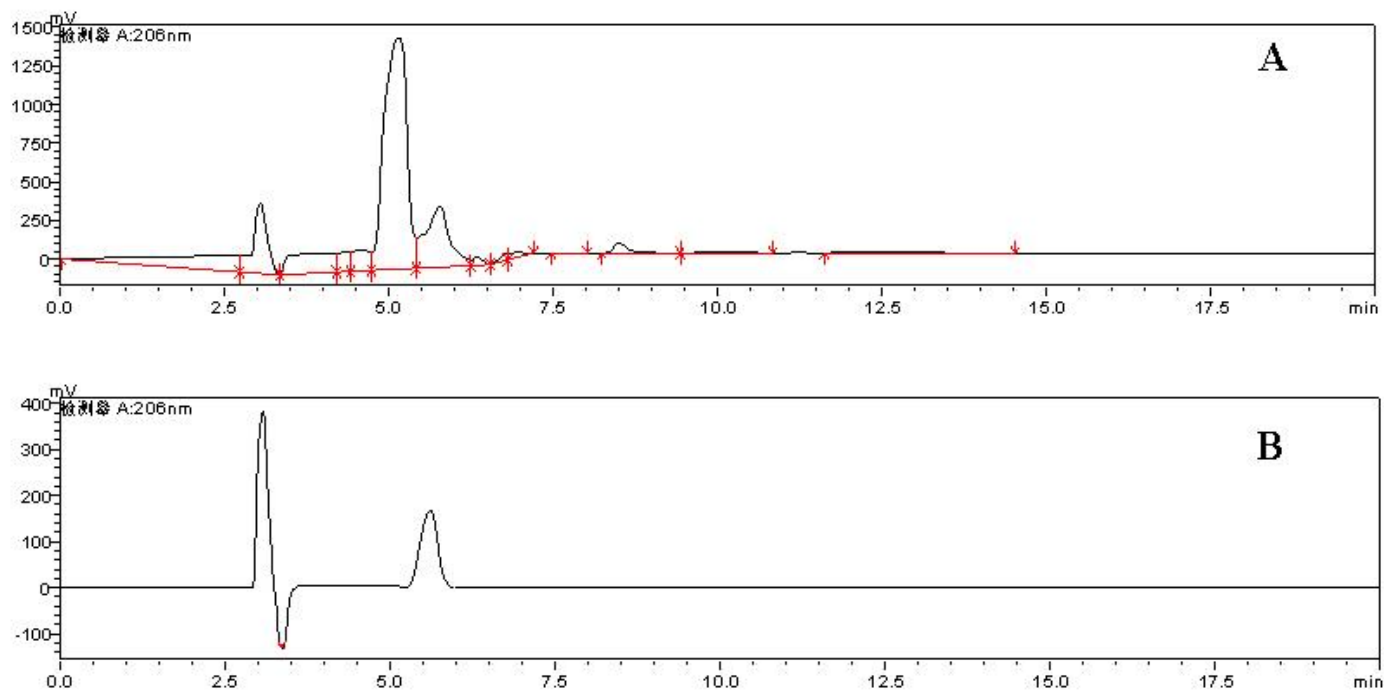

Figure S1. Analytical HPLC chromatogram of chlorephedrine sample (A) and (1R, 2S)-β-chloro-methamphetamine (B)  
 Chiral separation conditions: a chiralpak AD-H column (250 mm×4.6 mm, 5 μm, DAICEL, Osaka, Japan);  
 Column temperature was 25℃; Mobile phase was *n*-hexane:2-propanol:trifluoroacetic acid:triethylamine=92:8:0.1:0.05;  
 Flow rate was 1.0 mL/min.
